# Supplementary material
Source: PubMed Central journal article supplement (PMC6586560)
Supplement: NIHMS1013553-supplement-2.pdf [file NIHMS1013553-supplement-2.pdf]

**Supplemental Table 2.** Spearman Correlation Coefficients of OCTA and OCT parameters with Mini-Mental State Exam (MMSE)

| Parameter                  | AD, MCI, and Controls |         |
|----------------------------|-----------------------|---------|
|                            | Spearman $\rho$       | p value |
| Average RNFL Thickness     | 0.1317                | 0.0092  |
| Average GC-IPL Thickness   | 0.2342                | < 0.001 |
| Central subfield thickness | 0.0480                | 0.3437  |
| FAZ area 3x3mm             | 0.0574                | 0.2646  |
| Perfusion Density          |                       |         |
| 6mm circle, 6x6mm          | 0.0637                | 0.2200  |
| 3mm ring, 6x6mm            | 0.0519                | 0.3175  |
| 6mm ring, 6x6mm            | 0.0804                | 0.1211  |
| 3mm circle, 3x3mm          | 0.1456                | 0.0040  |
| 3mm ring, 3x3mm            | 0.1604                | 0.0015  |
| Vessel Density             |                       |         |
| 6mm circle, 6x6mm          | 0.0599                | 0.2485  |
| 3mm ring, 6x6mm            | 0.0466                | 0.3691  |
| 6mm ring, 6x6mm            | 0.0839                | 0.1059  |
| 3mm circle, 3x3mm          | 0.1528                | 0.0026  |
| 3mm ring, 3x3mm            | 0.1682                | 0.0009  |
